# Supplementary material for: Fusion with wild-type SNARE domains is controlled by juxtamembrane domains, transmembrane anchors, and Sec17
Source: PubMed Central journal article supplement — Mol Biol Cell. 2022 Apr 14;33(5):ar38. doi: 10.1091/mbc.E21-11-0583 (PMC9282010; doi:10.1091/mbc.e21-11-0583), 2022-04-14

# Supplementary Materials

*Molecular Biology of the Cell*

Orr *et al.*

**Supplemental Figure S1.** (A) The kinetics of fusion is shown for one replicate from Figure 5. Fusion of Jx swapped proteoliposomes is rescued by Sec17/Sec18/ATPgS even when zippering is arrested by Qc3Δ. (B) *Trans*-SNARE complexes form despite the swapped Jx regions of R and Qa, the presence or absence of Sec17/Sec18/ATPgS, and despite arrested SNARE zippering imposed by the truncated Qc SNARE.

**Supplemental Figure S2.** (A) The kinetics of fusion are shown from one replicate of Figure 6. Having integral Qb on the membrane along with the Jx-swapped Qa relieves the block to fusion in the absence of Sec17. (B) A representative Western blot image is shown, indicating that differences in fusion are not due to differences in *trans*-SNARE complex assembly.

**Supplemental Figure S3.** Lowered levels of bound Qb do not *per se* render fusion sensitive to Jx swap. One of the 3 sets of fusion reactions shown in Figure 7.

**Supplemental Figure S4.** The absence of a Qb membrane anchor renders fusion sensitive to Jx swap between R and Qa. One of the 3 sets of fusion reactions from Figure 8 is shown.

**Supplemental Figure S5.** Kinetics of fusion between R and QaQbQc proteoliposomes, with either sQb or wild-type, membrane-anchored Qb incorporated into the 3Q-SNARE complex during proteoliposome preparation, and with either wild-type or swapped R and Qa Jx

domains. Kinetic data from one of the 3 repeat assays for Figure 9 is shown.

**Supplemental Figure S6.** Kinetics of fusion of one of three repeat assays is shown for Figure 10. (A) Fusion of Jx-swapped R+Qa RPLs remains sensitive to the addition of Sec17 with its hydrophobic loop even in the presence of Sec18/ATP. (B) Sec17 (wild-type or FSMS) is not needed for fusion with Jx-swapped RPLs with 2 anchored Q-SNAREs in the presence of Sec18/ATP.

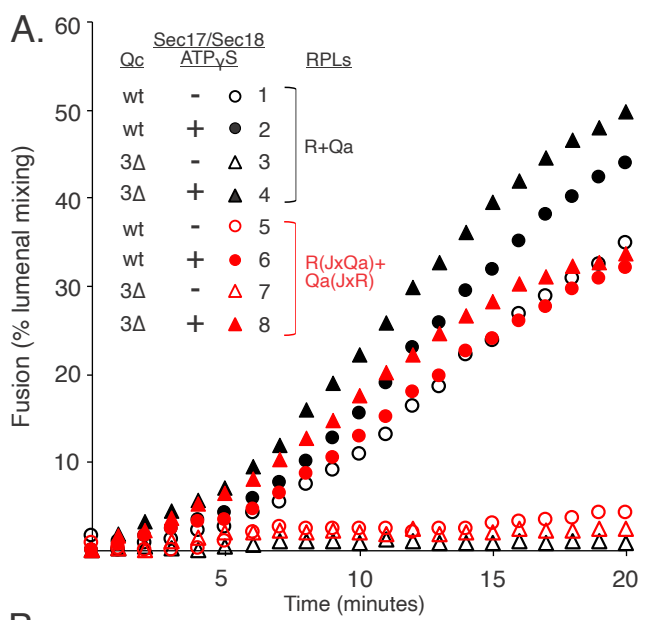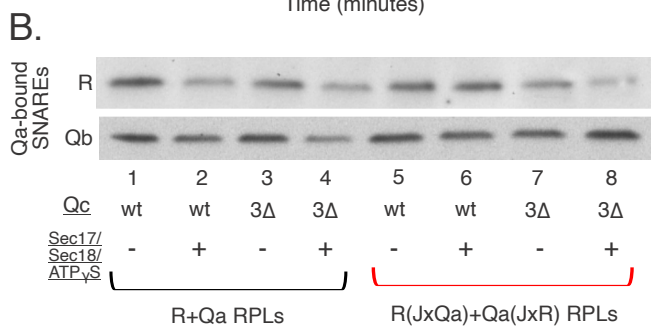

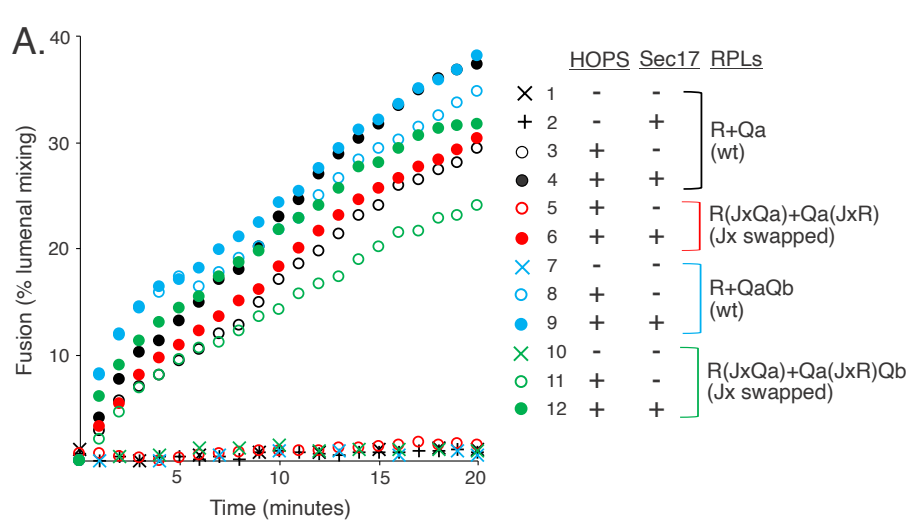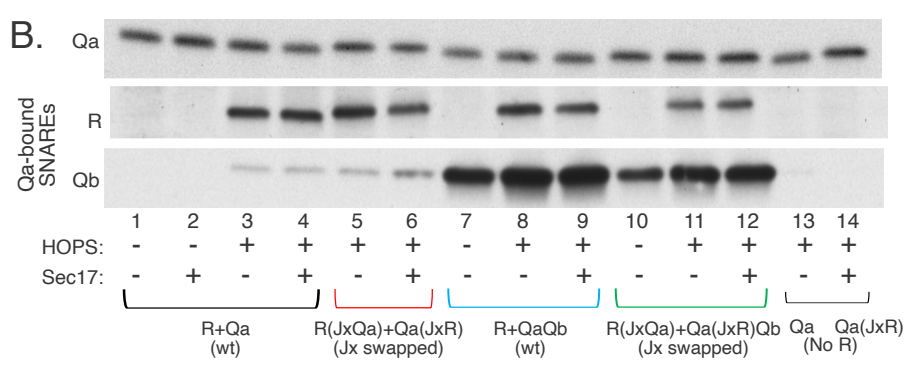

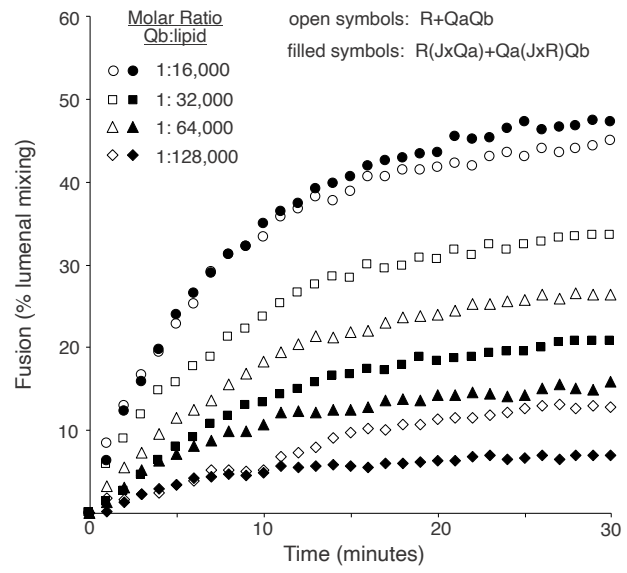

Qb:Lipid Molar ratio 1:64,000

Qb:Lipid Molar ratio 1:128,000

sQb:Lipid Molar ratio 1:200,000

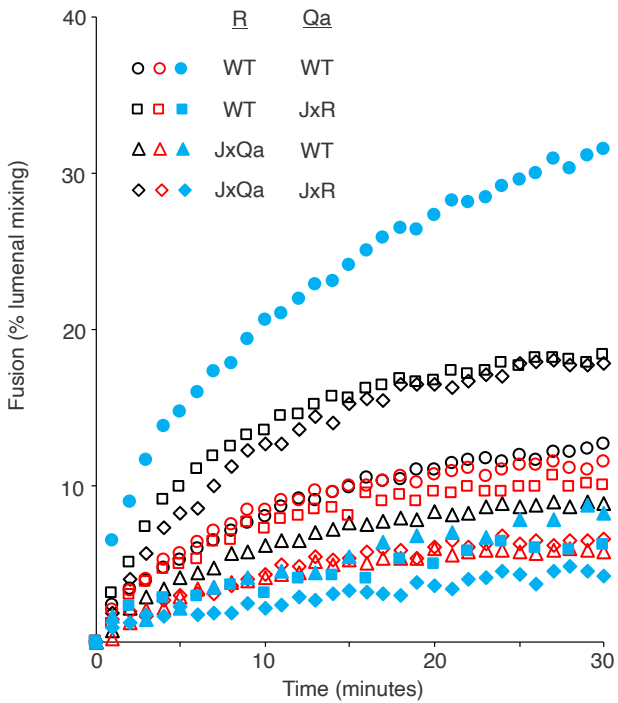

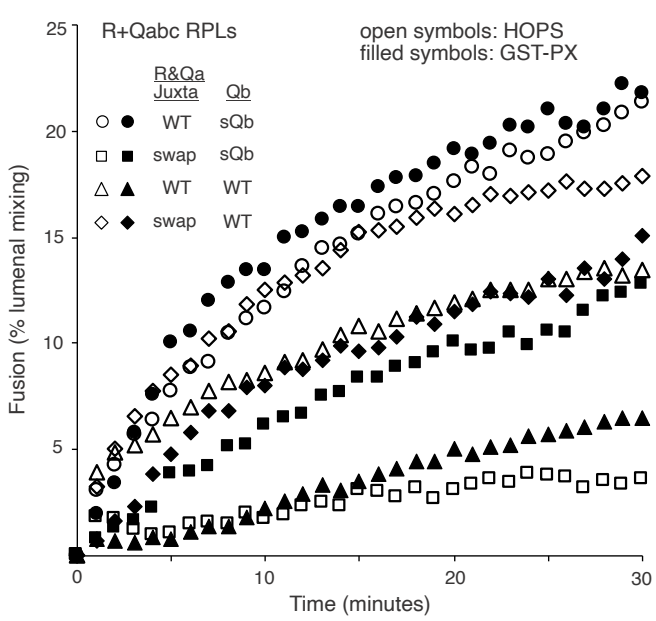



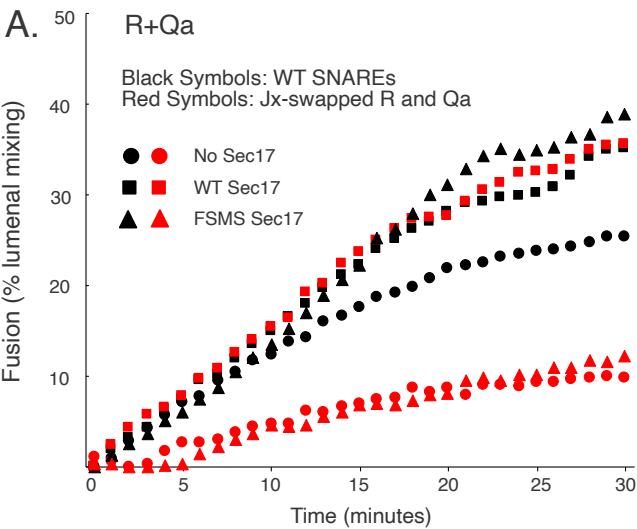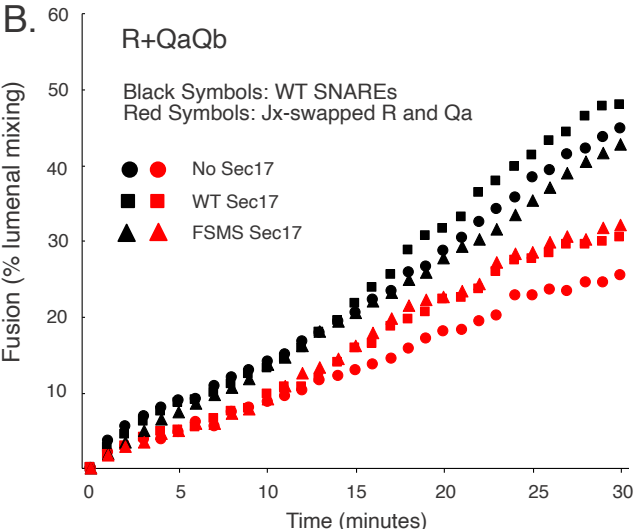

Supplement: mbc-33-ar38-s001.pdf [file mbc-33-ar38-s001.pdf]
